# Supplementary material
Source: Elsevier journal article supplement (https://www.sciencedirect.com/science/article/pii/S1579212918301861)
Supplement: mmc1 [file S1579212918301861:mmc1.doc]

**SUPLEMENTO**

**Imagen Suplementaria 1. Regresión logística del modelo de predicción del CANO, comparando los niveles observados con la regresión del valor predicho estandarizado. Las líneas representan la media con el intervalo de confianza al 95% de la recta de regresión.**

*
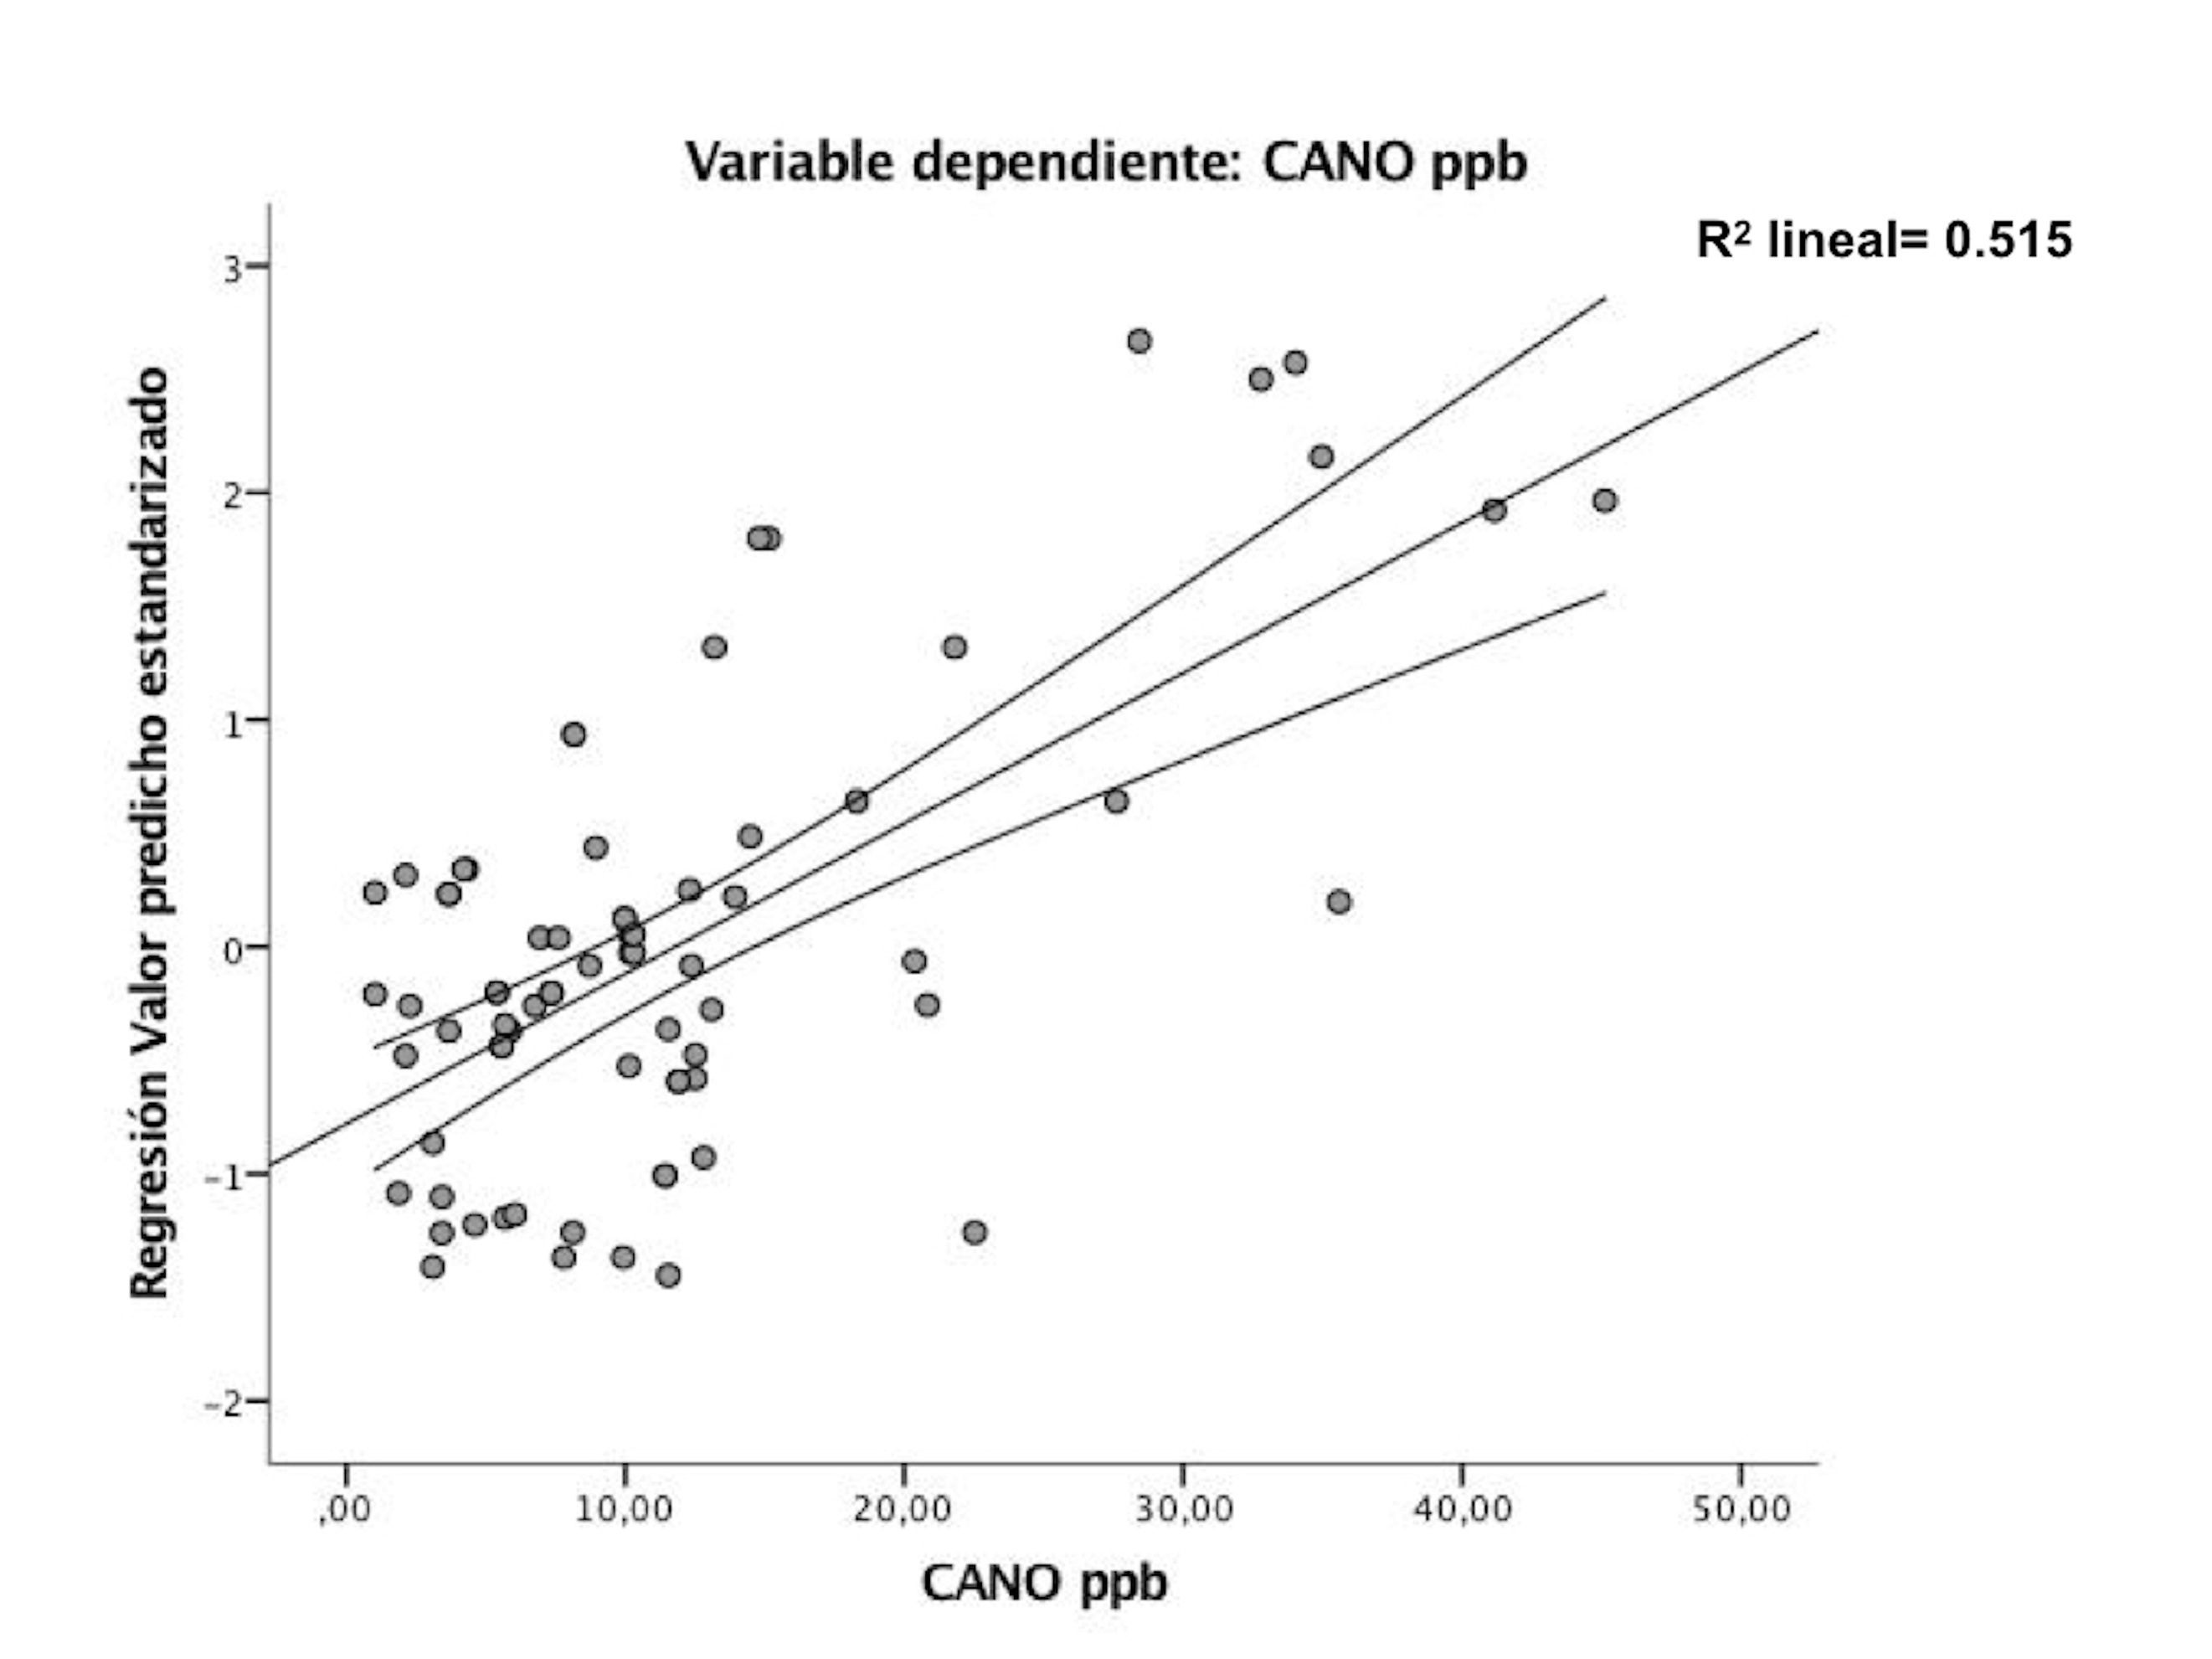
*

**Imagen Suplementaria 2. Regresión logística del modelo de predicción del JawNO, comparando los niveles observados con la regresión del valor predicho estandarizado**. **Las líneas representan la media con el intervalo de confianza al 95% de la recta de regresión.
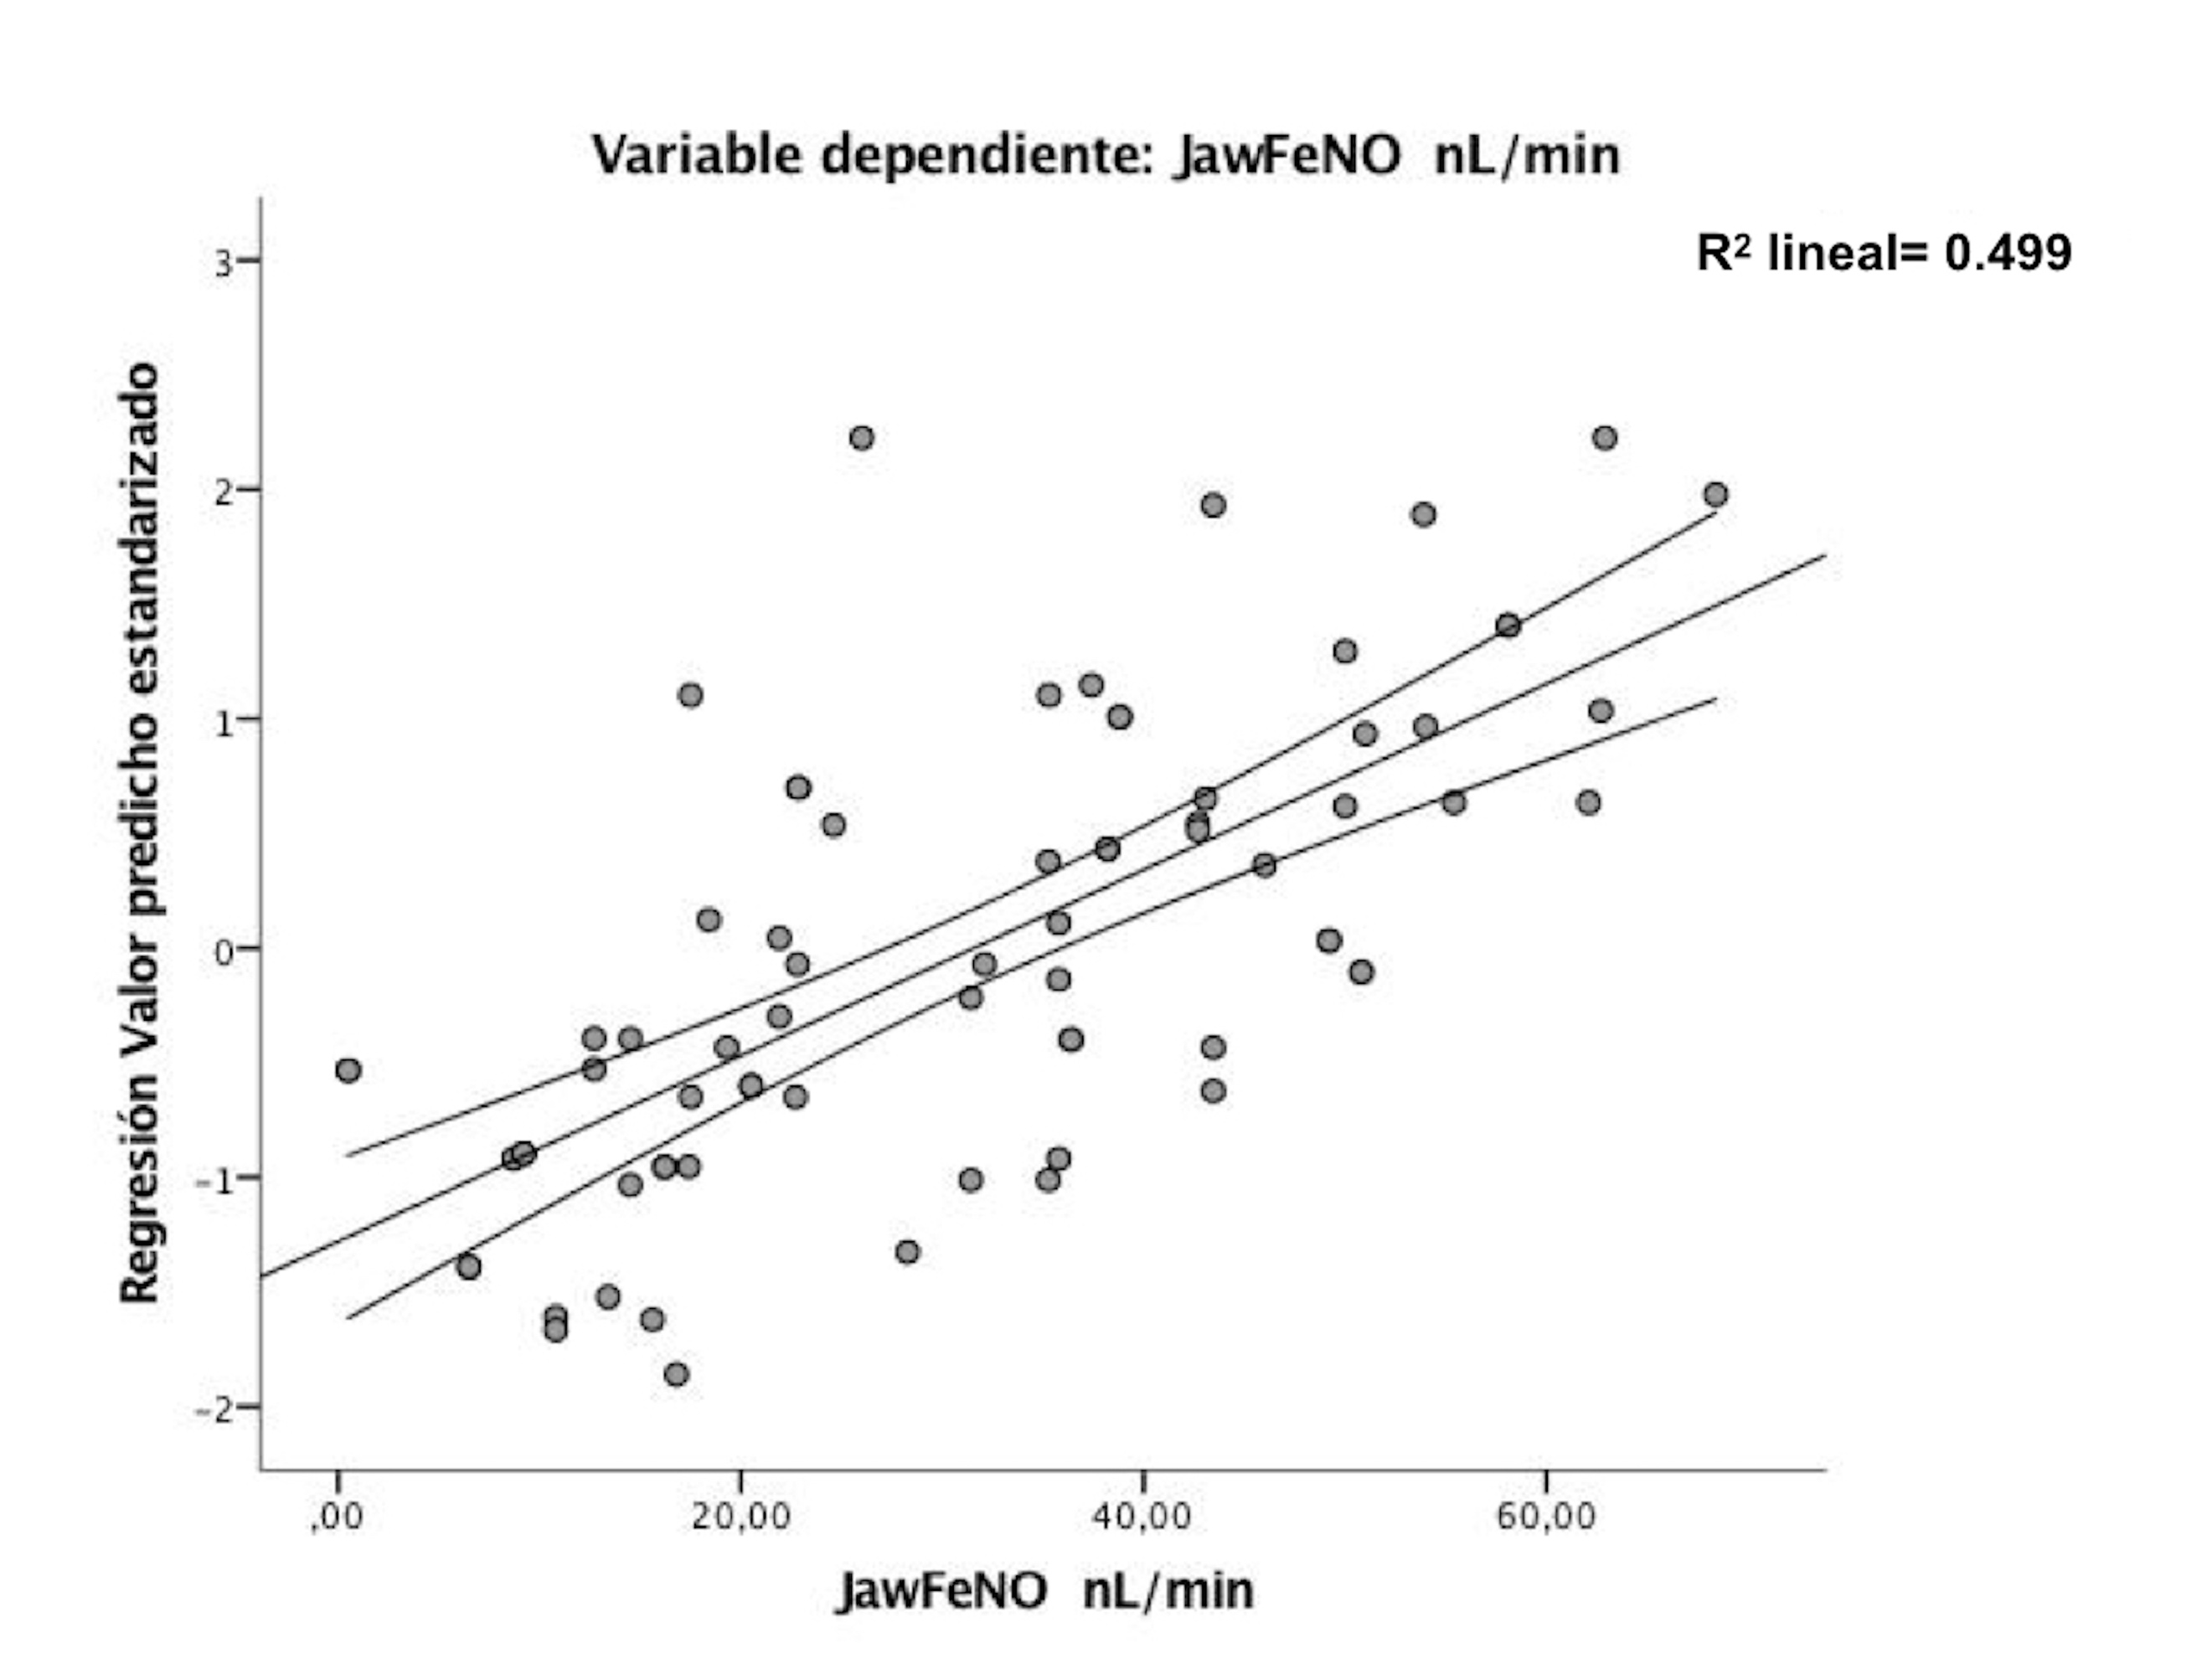
**

**Tabla Suplementaria 1.- Diagnóstico de colinealidad entre las diferentes variables incluidas en el modelo de regresión lineal para CANO.**

| **Diagnósticos de colinealidad** | | | | | | | | |  |  | |
| --- | --- | --- | --- | --- | --- | --- | --- | --- | --- | --- | --- |
| **Dimensión** | **Autovalor** | **Índice de condición** | **Proporciones de varianza** | | | | | | | | | |
| **(Constante)** | **TABACO** | **ICS** | **FEV1,%** | **DLCO,%** | **PCR** | **Eoxinófilos x10-3, uL** | | **Ex moderadas y graves, año previo** | |
| **1**  **2**  **3**  **4**  **5**  **6**  **7**  **8** | 6,400 | 1,000 | ,00 | ,00 | ,00 | ,00 | ,00 | ,01 | ,00 | | ,00 | |
| ,643 | 3,156 | ,00 | ,00 | ,00 | ,00 | ,01 | ,67 | ,02 | | ,00 | |
| ,467 | 3,700 | ,00 | ,01 | ,06 | ,01 | ,01 | ,09 | ,00 | | ,22 | |
| ,194 | 5,751 | ,00 | ,03 | ,31 | ,00 | ,05 | ,00 | ,24 | | ,20 | |
| ,155 | 6,435 | ,00 | ,08 | ,31 | ,01 | ,01 | ,16 | ,46 | | ,06 | |
| ,078 | 9,085 | ,01 | ,41 | ,12 | ,03 | ,46 | ,05 | ,18 | | ,02 | |
| ,045 | 11,991 | ,04 | ,23 | ,18 | ,55 | ,46 | ,00 | ,03 | | ,10 | |
| ,020 | 17,824 | ,95 | ,23 | ,00 | ,40 | ,00 | ,03 | ,07 | | ,40 | |

**Tabla Suplementaria 2.- Diagnóstico de colinealidad entre las variables incluidas en el modelo de regresión lineal para el JawNO**

| **Diagnósticos de colinealidad** | | | | | | | | |  |  |
| --- | --- | --- | --- | --- | --- | --- | --- | --- | --- | --- |
| **Dimensión** | **Autovalor** | **Índice de condición** | **Proporciones de varianza** | | | | | | | |
| **(Constante)** | **TABACO** | **ICS** | **FEV1,%** | **DLCO,%** | **PCR** | **Eoxinófilos x10-3, uL** | **Ex moderadas y graves, año previo** |
| 1  2  3  4  5  6  7  8 | 6,483 | 1,000 | ,00 | ,00 | ,00 | ,00 | ,00 | ,01 | ,00 | ,00 |
| ,639 | 3,185 | ,00 | ,00 | ,00 | ,00 | ,01 | ,68 | ,02 | ,00 |
| ,428 | 3,892 | ,00 | ,01 | ,04 | ,01 | ,01 | ,05 | ,01 | ,26 |
| ,174 | 6,108 | ,00 | ,15 | ,04 | ,00 | ,01 | ,07 | ,44 | ,02 |
| ,150 | 6,579 | ,00 | ,00 | ,56 | ,01 | ,02 | ,07 | ,12 | ,20 |
| ,070 | 9,604 | ,03 | ,19 | ,01 | ,00 | ,82 | ,07 | ,15 | ,00 |
| ,039 | 12,961 | ,10 | ,46 | ,32 | ,38 | ,07 | ,01 | ,24 | ,07 |
| ,018 | 19,227 | ,87 | ,19 | ,03 | ,60 | ,06 | ,04 | ,03 | ,44 |
